# Supplementary material
Source: HighWire-hosted journal article supplement (https://bmjopenquality.bmj.com/content/11/1/e001444)
Supplement: inline-supplementary-material-2 [file inline-supplementary-material-2.pdf]

## TELE-OTOLOGY PILOT: Patient satisfaction questionnaire

How satisfied are you with how long it took to get this appointment?

1      2      3      4      5      6      7      8      9      10

**Dissatisfied**

**Very Satisfied**

How satisfied are you with how long it took to be seen today?

1      2      3      4      5      6      7      8      9      10

**Dissatisfied**

**Very Satisfied**

How satisfied are you with how long your appointment took?

1      2      3      4      5      6      7      8      9      10

**Dissatisfied**

**Very Satisfied**

How busy was the waiting area?

1      2      3      4      5      6      7      8      9      10

**Not Busy**

**Very Busy**

Was it easier to get to here than to go to the hospital for a hearing test and assessment?

**Yes**

**No**

Would you have preferred to go to a hospital for your hearing test and assessment?

**Yes**

**No**

Would you recommend this service to another patient?

**Yes**

**No**

Would you have preferred to see a doctor at your first appointment?

**Yes**

**No**

Any other comments:

.....  
.....
